# Supplementary material for: Impact of C57BL/6J and SV-129 Mouse Strain Differences on Ischemia-Induced Postnatal Angiogenesis and the Associated Leukocyte Infiltration in a Murine Hindlimb Model of Ischemia
Source: MDPI journal article supplement (doi:10.3390/ijms222111795), 2021-10-30
Supplement: s1 [file s1]

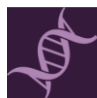

Article

# Impact of C57BL/6J and SV-129 mouse strain differences on ischemia-induced postnatal angiogenesis and the associated leukocyte infiltration in a murine hindlimb model of ischemia

Matthias Kübler <sup>1,2,†</sup>, Philipp Götz <sup>1,2,†</sup>, Anna Braumandl <sup>1,2</sup>, Sebastian Beck <sup>1,2</sup>, Hellen Ishikawa-Ankerhold <sup>1,3</sup> and Elisabeth Deindl <sup>1,2,\*</sup>

<sup>1</sup> Walter-Brendel-Centre of Experimental Medicine, University Hospital, Ludwig-Maximilians-Universität München, 81377, Munich, Germany; Matthias.Kuebler@med.uni-muenchen.de (M.K.); P.Goetz@med.uni-muenchen.de (P.G.); Anna.Braumandl@med.uni-muenchen.de (A.B.); sebastian.beck@med.uni-muenchen.de (S.B.); Hellen.Ishikawa-Ankerhold@med.uni-muenchen.de (H.I.-A.); Elisabeth.Deindl@med.uni-muenchen.de (E.D.)

<sup>2</sup> Biomedical Center, Institute of Cardiovascular Physiology and Pathophysiology, Ludwig-Maximilians-Universität München, 82152, Planegg-Martinsried, Germany

<sup>3</sup> Department of Internal Medicine I, Faculty of Medicine, University Hospital, Ludwig-Maximilians-Universität München, 81377, Munich, Germany

\* Correspondence: Elisabeth.Deindl@med.uni-muenchen.de; Tel.: +49 (0) 89 2180 76504

† These authors contributed equally to this work.

## Supplement

**Citation:** Kübler, M.; Götz, P.; Braumandl, A.; Beck, S.; Ishikawa-Ankerhold, H.; Deindl, E. Impact of C57BL/6J and SV-129 mouse strain differences on ischemia-induced postnatal angiogenesis and the associated leukocyte infiltration in a murine hindlimb model of ischemia. *Int. J. Mol. Sci.* **2021**, *22*, 1795. <https://doi.org/10.3390/ijms22211795>

Academic Editor: Maria Luisa Balestrieri

Received: 21 September 2021

Accepted: 27 October 2021

Published: 30 October 2021

**Publisher's Note:** MDPI stays neutral with regard to jurisdictional claims in published maps and institutional affiliations.

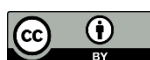

**Copyright:** © 2021 by the authors. Submitted for possible open access publication under the terms and conditions of the Creative Commons Attribution (CC BY) license (<http://creativecommons.org/licenses/by/4.0/>).

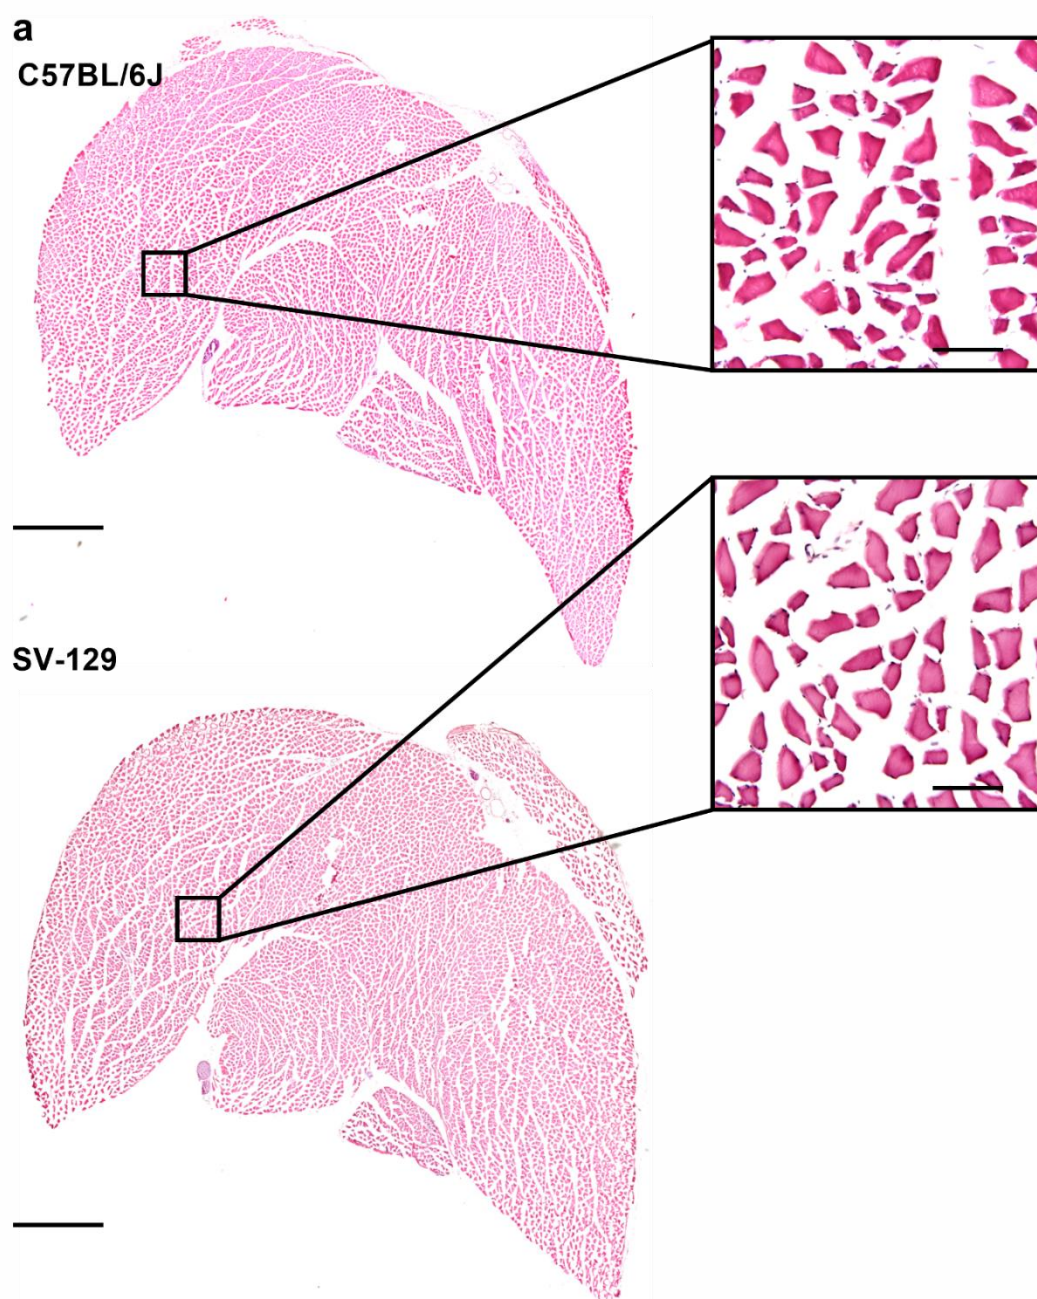

**Supplement Figure S1.** Gastrocnemius muscle tissue from sham-operated *C57BL/6J* and *SV-129* mice show no ischemic tissue damage. Representative pictures of hematoxylin and eosin (H&E)-stained sham-operated gastrocnemius muscles of *C57BL/6J* (top) and *SV-129* mice (bottom) collected 7 days after femoral artery ligation (FAL). Scale bars: 1000 µm (overview), 100 µm (detail).
